# Supplementary material
Source: Springer Nature journal article supplement (https://www.springermedizin.de/resource/supplementary/12885_2007_940_MOESM2_ESM.pdf/9471200)

## Additional File 2

**Option 1)**

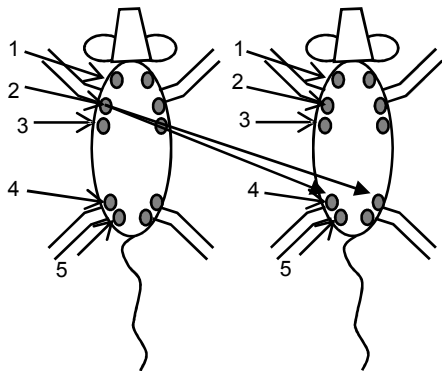

**Option 2)**

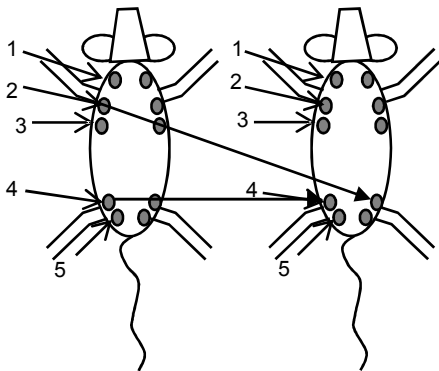

**Option 3)**

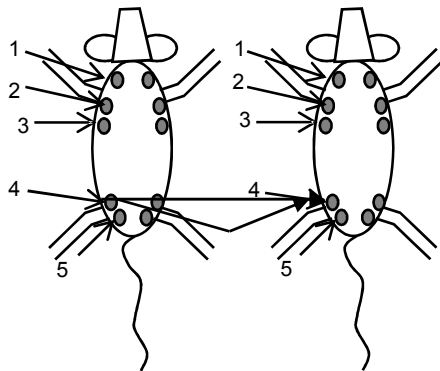

Supplement: MOESM2 [file 9471200]
